# Supplementary material for: Helicobacter pylori oriC—the first bipartite origin of chromosome replication in Gram-negative bacteria
Source: PubMed Central journal article supplement — Nucleic Acids Res. 2012 Aug 13;40(19):9647–60. doi: 10.1093/nar/gks742 (PMC3479198; doi:10.1093/nar/gks742), 2012-08-13
Supplement: supp_gks742_nar-00306-m-2012-File010.pdf [file supp_gks742_nar-00306-m-2012-File010.pdf]

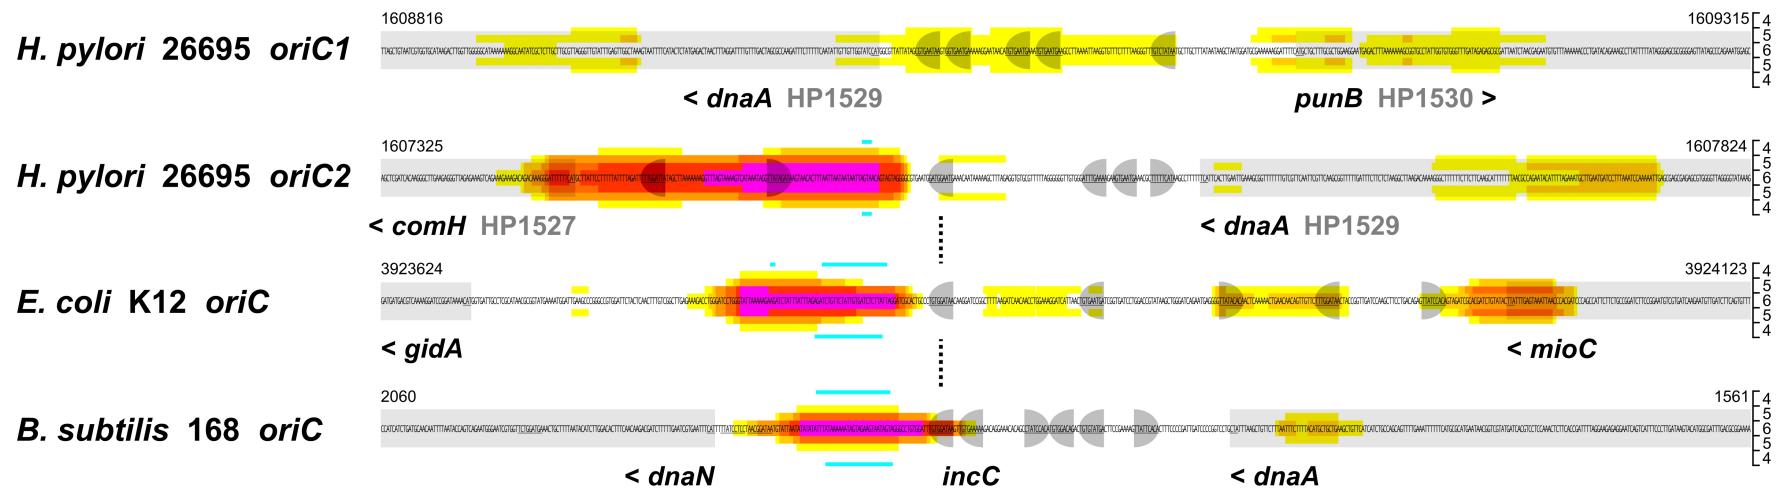

Figure S1. *In silico* prediction of the DNA unwinding element (DUE) in *H. pylori oriC* (the figure is the size-adjustable version of Figure 1). The heatmaps visualize the WebSIDD predictions for the central 500 bp of the 2.5 kb DNA sequences analyzed. Energy input values ( $\text{kcal}\cdot\text{mol}^{-1}$ ) required for strand separation as predicted basewise are shown by the following color code: no color  $>5$ , yellow  $<5$ , light orange  $<4$ , orange  $<3$ , dark orange  $<2$ , red  $<1$ , pink  $<0$  above and below the sequence. Superhelicity values tested from  $\sigma = -0.040$  (4) to  $\sigma = -0.060$  (6) in increments of 0.005 are shown as the y-axis on the right of the heatmaps, mirrored on the sequence. Genome position numbering is according to GenBank entries for *H. pylori* 26695 [AE000511], *E. coli* K12 W3110 [AP009048], and *B. subtilis* 168 [AL009126]. Open reading frames are shown as light grey boxes with the assigned gene names (and/or IDs); arrowheads indicate the direction of transcription. DnaA-binding sites are shown within the DNA sequences as grey half-circles, rightward-bound for the consensus TTWTCACA and leftward-bound for the reverse orientation TGTGNAAWAA, respectively, according to Schaper and Messer (1995). Light blue lines above and below the heatmaps indicate the experimentally determined unwound regions; data are from this study for *H. pylori oriC2* and taken from Krause *et al.* (1997) for *E. coli oriC* and *B. subtilis oriC (incC)*.

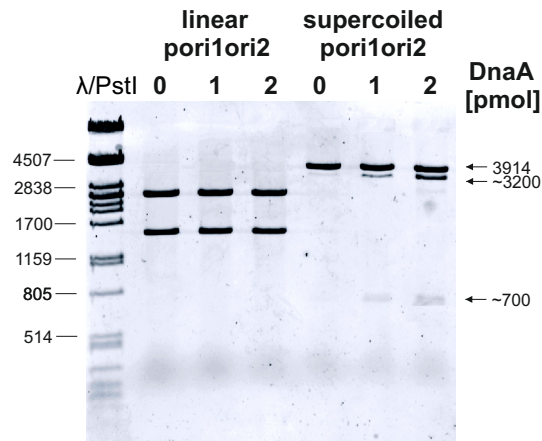

Figure S2. Analysis of linear and supercoiled *oriC2* unwinding by *H. pylori* DnaA. P1 nuclease assay determining the requirement for superhelicity in the DUE unwinding of *H. pylori oriC*. Supercoiled or EcoRI linearized plasmid was incubated with the indicated amounts of the HpDnaA protein, treated with P1 nuclease, purified and restricted by ScaI. The results were analyzed in 1% agarose gel and ethidium bromide staining.

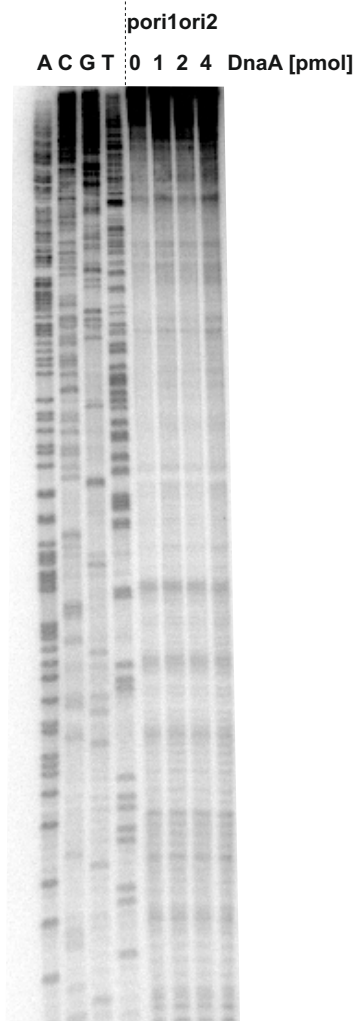

Figure S3. Primer extension analysis of the DNA unwinding within *oriC1*. Plasmid DNA, after incubation with the indicated amounts of the DnaA protein and P1 nuclease treatment, was used as a substrate for primer extension analysis. <sup>32</sup>P labeled primer P-35 (Figure S4) was complementary to the non-coding strand (with respect to the *dnaA* gene). A, C, G, T sequencing reactions were carried out with <sup>32</sup>P labeled primer P-35 and the pori1ori2 plasmid. The analysis showed that there is no unwinding within *oriC1* of pori1ori2, which confirmed the results obtained by analysis of the P1-digested plasmids in agarose gels (Figure 2) and by primer extension within *oriC2* (Figure 3).

*oriC1* { CTTCCAGCGCAAAGCAGCATGAAAATCCTTTTTTCGCATCCATTAGCTTATTATAAAGCAAGCATTATAGACA  
 AACCCCTAAAAGAAACACCTTAATTTTAAGGCTTCATTCACATTTTCATTCACATGTTATTCTTTTTTCATTCAC  
 CACTTATTCACGCTATAATAACGCCATGGATACCAACAACAATAT } // } CTTTCAATTCAAGTGAATGAAAAA  
 — *dnaA* —>

*oriC2* { AGGCTTATGAAAAAGCGTTTCATTCACCTCTTTTTCAAATCCACAACCCCTAAAAACGCACACCTCTAAA  
 GCTTTTTATTGTTTCATTCCATCCATTACGCCCTACTACTGTTACTAATTATTATTAATTAAGTGTTACTTAT  
 CTATAACCTATTTATGACTTTTACTAAACC TTTTTTTAAGCTATAATCCAGGGGATCCTCTAGAGTCGAC CTGC  
 AGCCCAGGATATCCTATCGATGATAAGCTGTCAAACATGAG

Sequence above corresponds to *pori1ori2* plasmid.

**Features:**

-  —> P-35 (Primer extension; Fig. S3)
-  —> P-9 (Primer extension, RIP; Fig. 3, Fig. 5)
-  —> P-10 (Primer extension; Fig. 3)
-  —> Sequence from GHPAQ41 plasmid present only in *pori1ori2* plasmid. Distance from P-10 to the unwinding site is 40 bp shorter in case of *pori2*.

Figure S4. Sequence of *H. pylori oriC1* and *oriC2* regions cloned into the *pori1ori2* plasmid. Coding strand sequence (with respect to the *dnaA* gene) is presented. Annealing sites for primers used in experiments in this study are indicated according to the legend. DnaA boxes in *oriC1* region are shaded in grey. AT-rich sequence (identified *in silico* as a DUE) is indicated by a dotted line, single and double lines refer to the areas unwound by DnaA *in vitro* (as determined by comparison of primer extension results on primers P-9 and P-10, Figure 3) on *pori2* and *pori1ori2* plasmids, respectively.
